# Supplementary material for: Organocatalytic synthesis and post-polymerization functionalization of propargyl-functional poly(carbonate)s
Source: Royal Society of Chemistry journal article supplement (doi:10.1039/c2py20718d), 2012-09-17
Supplement: c2py20718d.pdf [file c2py20718d.pdf]

# Organocatalytic Synthesis and Post-Polymerization Functionalization of Propargyl-Functional Poly(Carbonate)s

*Sarah Tempelaar,<sup>a</sup> Ian A. Barker,<sup>a</sup> Vinh X. Truong,<sup>a</sup> Daniel J. Hall,<sup>a</sup> Laetitia Mespouille,<sup>b</sup> Philippe Dubois<sup>b</sup> and Andrew P. Dove.<sup>a\*\*</sup>*

*<sup>a</sup>Department of Chemistry, University of Warwick, Coventry, CV4 7AL, U.K. <sup>b</sup>Laboratory of Polymeric and Composite Materials (LPCM), Center of Innovation and Research in Materials and Polymers (CIRMAP), University of Mons (UMONS), 20, Place du Parc, 7000 Mons, Belgium.*

## Supplementary Information

**Figure S1.** a) MALDI-TOF MS spectra in reflectron ion-mode showing the isotope pattern of DP10 polymer chains of PMPC initiated from benzyl alcohol from polymerizations in CH<sub>2</sub>Cl<sub>2</sub> (top) and CDCl<sub>3</sub> (bottom); b) Predicted isotopic distributions of DP10 polymer chains expected for PMPC with all protons retained (top), with 1, 2 and 3 protons exchanged with deuterium in a 1:1:1 ratio (middle) and with all acetylenic protons exchanged (top).

**Figure S2.** GPC chromatograms of block copolymers and their corresponding macro-initiator: (a) BnO-PLA<sub>18</sub>-OH ( $M_n = 4\,200\text{ g mol}^{-1}$ ;  $\mathcal{D}_M = 1.09$ ) and BnO-PLA<sub>18</sub>-*b*-PMPC<sub>20</sub>-OH ( $M_n = 8\,740\text{ g mol}^{-1}$ ;  $\mathcal{D}_M = 1.08$ ); (b) BnO-PMPC<sub>20</sub>-OH ( $M_n = 4\,540\text{ g mol}^{-1}$ ;  $\mathcal{D}_M = 1.12$ ) and BnO-PMPC<sub>20</sub>-*b*-PLA<sub>24</sub>-OH ( $M_n = 10\,350\text{ g mol}^{-1}$ ;  $\mathcal{D}_M = 1.09$ ); (c) MeO-PEO<sub>114</sub>-OH ( $M_n = 6\,790\text{ g mol}^{-1}$ ;  $\mathcal{D}_M = 1.03$ ) and MeO-PEO<sub>114</sub>-*b*-PMPC<sub>18</sub>-OH ( $M_n = 11\,020\text{ g mol}^{-1}$ ;  $\mathcal{D}_M = 1.06$ ); (d)

BnO-PMPC<sub>17</sub>-OH ( $M_n = 4\,010\text{ g mol}^{-1}$ ;  $D_M = 1.11$ ) and BnO-PMPC<sub>17</sub>-*b*-PMAC<sub>19</sub>-OH ( $M_n = 8\,110\text{ g mol}^{-1}$ ;  $D_M = 1.09$ ).

**Table S1.** CuAAC functionalization of BnO-PMPC<sub>10</sub>-OH.

**Figure S3.** MALDI-ToF MS spectra of PMPC after CuAAC functionalization with 1-azidooctane with added NaTFA following purification with Cuprisorb<sup>TM</sup> beads (top), added NaTFA before purification (middle); and no added NaTFA before purification (bottom) - key (■) Cu<sup>+</sup> charged and (■) Na<sup>+</sup> charged chains.

**Figure S4.** <sup>1</sup>H NMR spectra of PMPC after functionalization with benzyl azide in CDCl<sub>3</sub> (top) and of with 3-azido-7-hydroxylcoumarin in *d*-DMSO (bottom) (400 MHz, 298 K; \* = residual CDCl<sub>3</sub>, \*\* = H<sub>2</sub>O, \*\*\* = residual *d*-DMSO).

**Figure S5.** MALDI-ToF MS spectrum of PMPC after CuAAC functionalization with 3-azido-7-hydroxylcoumarin (left) shows distribution with PMPC fully functionalized with 3-azido-7-hydroxylcoumarin azide (●) and polymer chains with 1 (●) or 2 (●) unfunctionalized propargyl groups.

**Figure S6.** DMF solutions of PMPC, 3-azido-7-hydroxylcoumarin, PMPC + 3-azido-7-hydroxylcoumarin, PMPC after functionalization with 3-azido-7-hydroxylcoumarin (A+C, from left to right) and of a further diluted solution of PMPC after functionalization (B+D) show fluorescence when irradiated at 365 nm with a UV lamp for the clicked polymer only (C+D).

**Table S2.** Radical 'thiol-yne' functionalization of BnO-PMPC<sub>12</sub>-OH.

**Figure S7.** <sup>1</sup>H NMR spectra of PMPC after functionalization with benzyl mercaptan in CDCl<sub>3</sub> (top) and with 1-thioglycerol in *d*-DMSO (bottom) (400 MHz, 298 K; \* = residual CDCl<sub>3</sub>/ *d*-DMSO, \*\* = H<sub>2</sub>O).

**Figure S8.** MALDI-ToF MS spectrum of PMPC after 'thiol-yne' functionalization with benzyl mercaptan showing a main distribution of fully functionalized polymer (●) and cross-linked, benzyl functionalized PMPC (●).

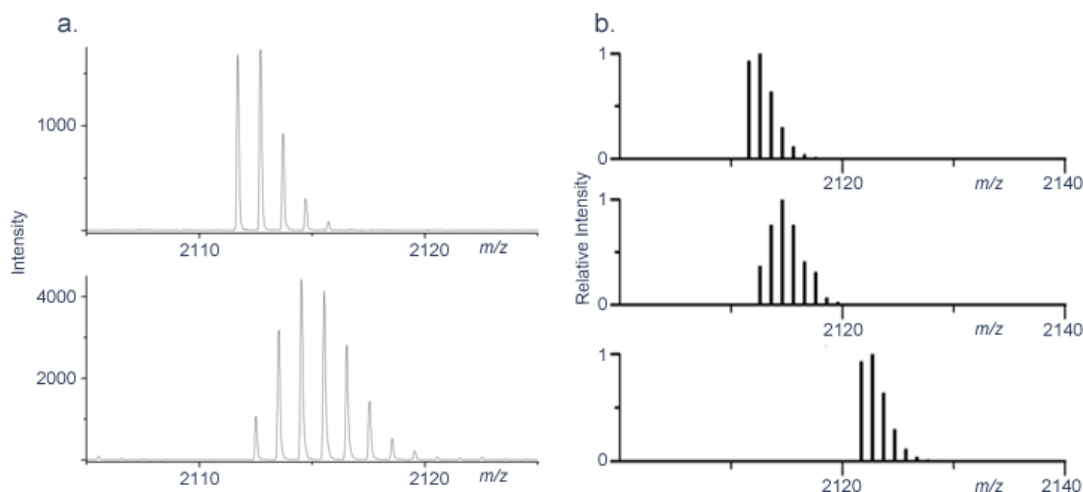

**Figure S1.** a) MALDI-TOF MS spectra in reflectron ion-mode showing the isotope pattern of DP10 polymer chains of PMPC initiated from benzyl alcohol from polymerizations in  $\text{CH}_2\text{Cl}_2$  (top) and  $\text{CDCl}_3$  (bottom); b) Predicted isotopic distributions of DP10 polymer chains expected for PMPC with all protons retained (top), with 1, 2 and 3 protons exchanged with deuterium in a 1:1:1 ratio (middle) and with all acetylenic protons exchanged (top).

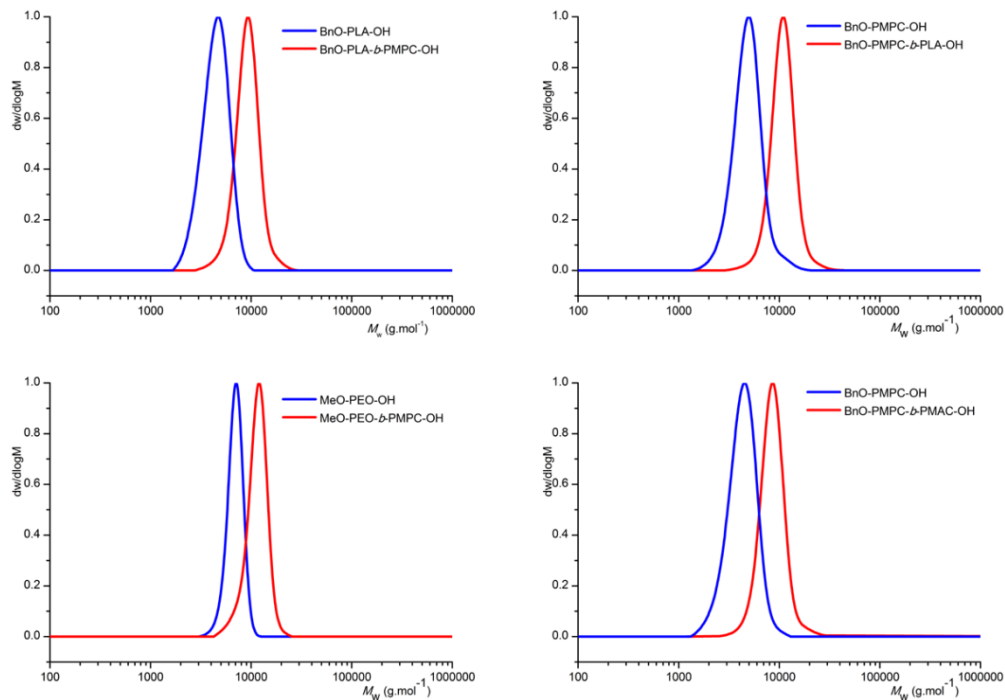

**Figure S2.** GPC chromatograms of block copolymers and their corresponding macro-initiator: (a) BnO-PLA<sub>18</sub>-OH ( $M_n = 4\,200\text{ g mol}^{-1}$ ;  $\mathcal{D}_M = 1.09$ ) and BnO-PLA<sub>18</sub>-*b*-PMPC<sub>20</sub>-OH ( $M_n = 8\,740\text{ g mol}^{-1}$ ;  $\mathcal{D}_M = 1.08$ ); (b) BnO-PMPC<sub>20</sub>-OH ( $M_n = 4\,540\text{ g mol}^{-1}$ ;  $\mathcal{D}_M = 1.12$ ) and BnO-PMPC<sub>20</sub>-*b*-PLA<sub>24</sub>-OH ( $M_n = 10\,350\text{ g mol}^{-1}$ ;  $\mathcal{D}_M = 1.09$ ); (c) MeO-PEO<sub>114</sub>-OH ( $M_n = 6\,790\text{ g mol}^{-1}$ ;  $\mathcal{D}_M = 1.03$ ) and MeO-PEO<sub>114</sub>-*b*-PMPC<sub>18</sub>-OH ( $M_n = 11\,020\text{ g mol}^{-1}$ ;  $\mathcal{D}_M = 1.06$ ); (d) BnO-PMPC<sub>17</sub>-OH ( $M_n = 4\,010\text{ g mol}^{-1}$ ;  $\mathcal{D}_M = 1.11$ ) and BnO-PMPC<sub>17</sub>-*b*-PMAC<sub>19</sub>-OH ( $M_n = 8\,110\text{ g mol}^{-1}$ ;  $\mathcal{D}_M = 1.09$ ).

**Table S1.** CuAAC functionalization of BnO-PMPC<sub>10</sub>-OH.<sup>a</sup>

| Azide                     | $M_n^b$ (g mol <sup>-1</sup> )          | $M_w/M_n^b$                           |
|---------------------------|-----------------------------------------|---------------------------------------|
| -                         | 2,240 <sup>c</sup> / 4,600 <sup>d</sup> | 1.33 <sup>c</sup> / 1.18 <sup>d</sup> |
| 1-azidooctane             | 5,560 <sup>c</sup>                      | 1.16 <sup>c</sup>                     |
| benzyl azide              | 2,670 <sup>c</sup>                      | 1.33 <sup>c</sup>                     |
| TEG azide                 | 2,480 <sup>c</sup>                      | 1.28 <sup>c</sup>                     |
| 3-azido-7-hydroxycoumarin | 8,610 <sup>d</sup>                      | 1.23 <sup>d</sup>                     |

<sup>a</sup> [PMPC]<sub>0</sub> = *ca.* 0.34 M in THF or DMF, 1.05 eq. azide, 25 °C, 24 h. <sup>b</sup> Measured by GPC analysis using. <sup>c</sup> THF or <sup>d</sup> DMF as eluent.

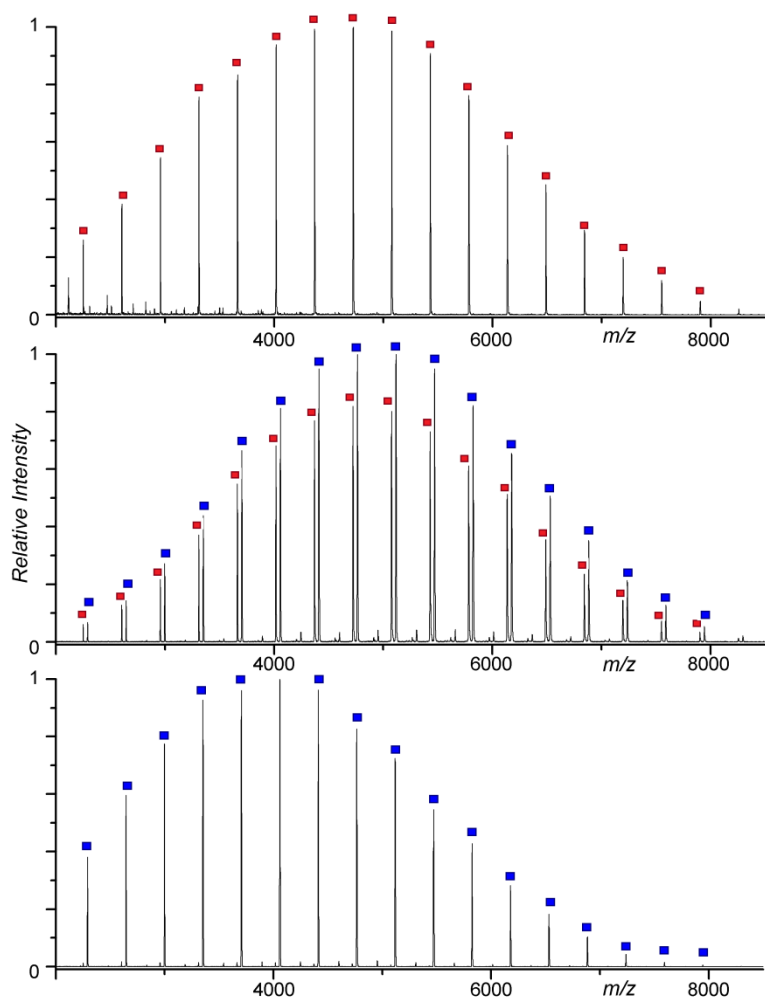

**Figure S3.** MALDI-ToF MS spectra of PMPC after CuAAC functionalization with 1-azidooctane with added NaTFA following purification with Cuprisorb<sup>TM</sup> beads (top), added NaTFA before purification (middle); and no added NaTFA before purification (bottom) - key (■) Cu<sup>+</sup> charged and (■) Na<sup>+</sup> charged chains.

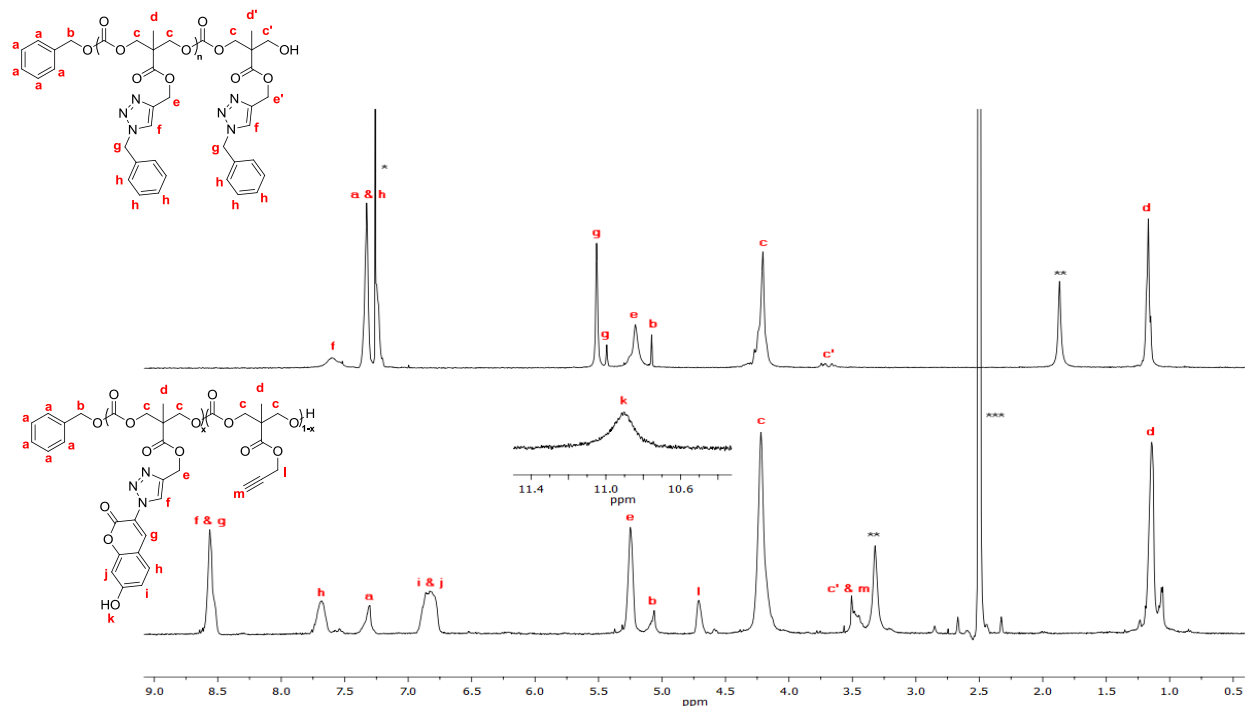

**Figure S4.**  $^1\text{H}$  NMR spectra of PMPC after functionalization with benzyl azide in  $\text{CDCl}_3$  (top) and of with 3-azido-7-hydroxycoumarin in  $d\text{-DMSO}$  (bottom) (400 MHz, 298 K; \* = residual  $\text{CDCl}_3$ , \*\* =  $\text{H}_2\text{O}$ , \*\*\* = residual  $d\text{-DMSO}$ ).

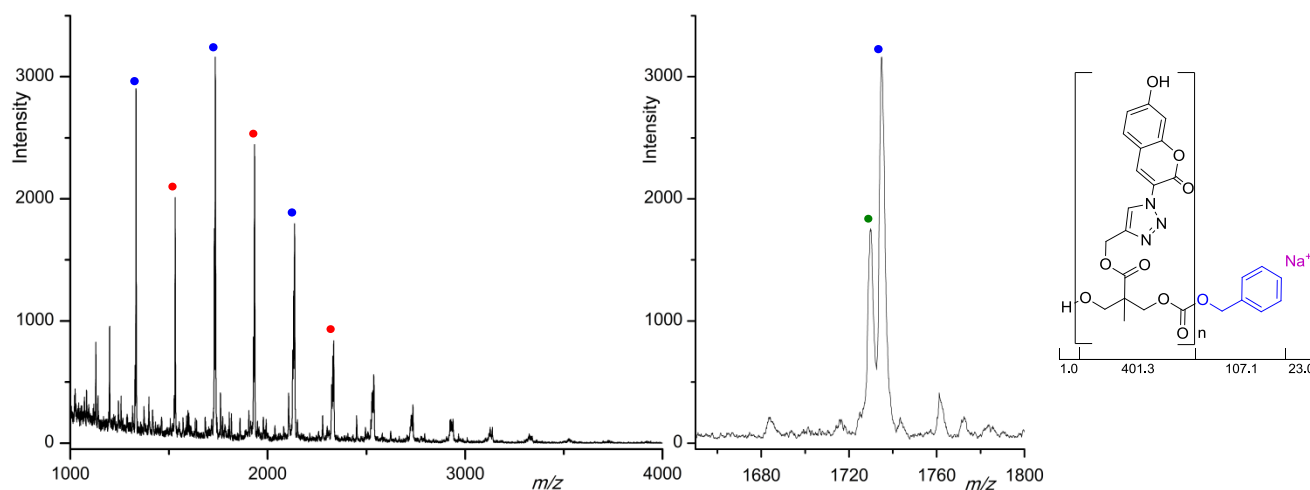

**Figure S5.** MALDI-ToF MS spectrum of PMPC after CuAAC functionalization with 3-azido-7-hydroxycoumarin (left) shows distribution with PMPC fully functionalized with 3-azido-7-hydroxycoumarin azide (●) and polymer chains with 1 (●) or 2 (●) unfunctionalized propargyl groups.

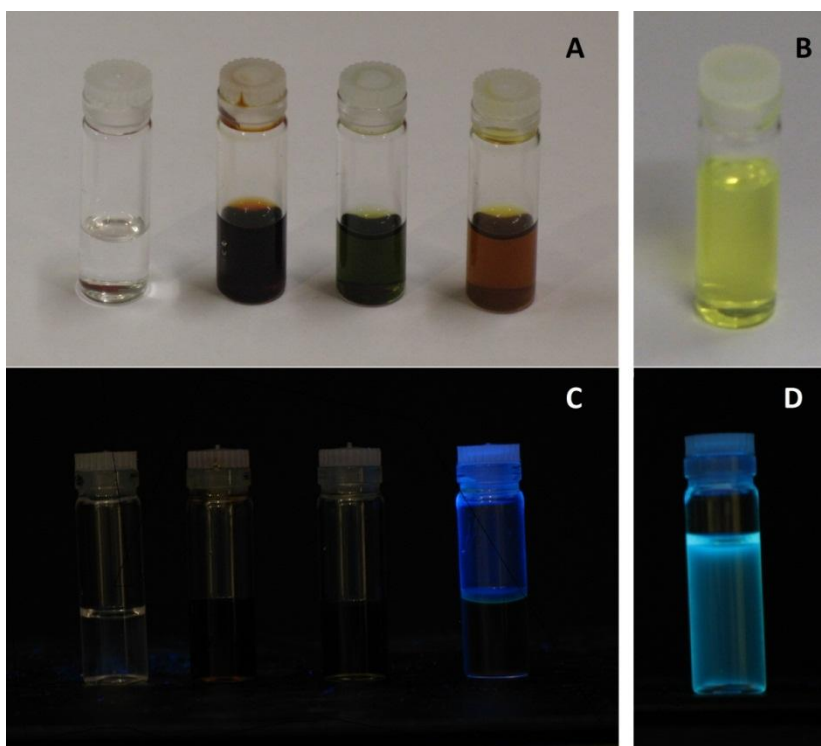

**Figure S6.** DMF solutions of PMPC, 3-azido-7-hydroxylcoumarin, PMPC + 3-azido-7-hydroxylcoumarin, PMPC after functionalization with 3-azido-7-hydroxylcoumarin (A+C, from left to right) and of a further diluted solution of PMPC after functionalization (B+D) show fluorescence when irradiated at 365 nm with a UV lamp for the clicked polymer only (C+D).

**Table S2.** Radical ‘thiol-yne’ functionalization of BnO-PMPC<sub>12</sub>-OH.<sup>a</sup>

| Thiol            | $M_n^b$ (g mol <sup>-1</sup> )          | $M_w/M_n^b$                           |
|------------------|-----------------------------------------|---------------------------------------|
| -                | 2,370 <sup>c</sup> / 5,810 <sup>d</sup> | 1.29 <sup>c</sup> / 1.17 <sup>d</sup> |
| 1-dodecanethiol  | 5,700 <sup>c</sup>                      | 1.80 <sup>c</sup>                     |
| benzyl mercaptan | 3,570 <sup>c</sup>                      | 1.36 <sup>c</sup>                     |
| 1-thioglycerol   | 7,830 <sup>c</sup>                      | 1.22 <sup>c</sup>                     |
| mercaptoethanol  | 7,830 <sup>d</sup>                      | 1.36 <sup>d</sup>                     |

<sup>a</sup> [PMPC]<sub>0</sub> = ca. 0.15 M in dioxane, 10 eq. thiol, 25 °C, 24 h. <sup>b</sup> Measured by GPC analysis using. <sup>c</sup> THF or <sup>d</sup> DMF as eluent.

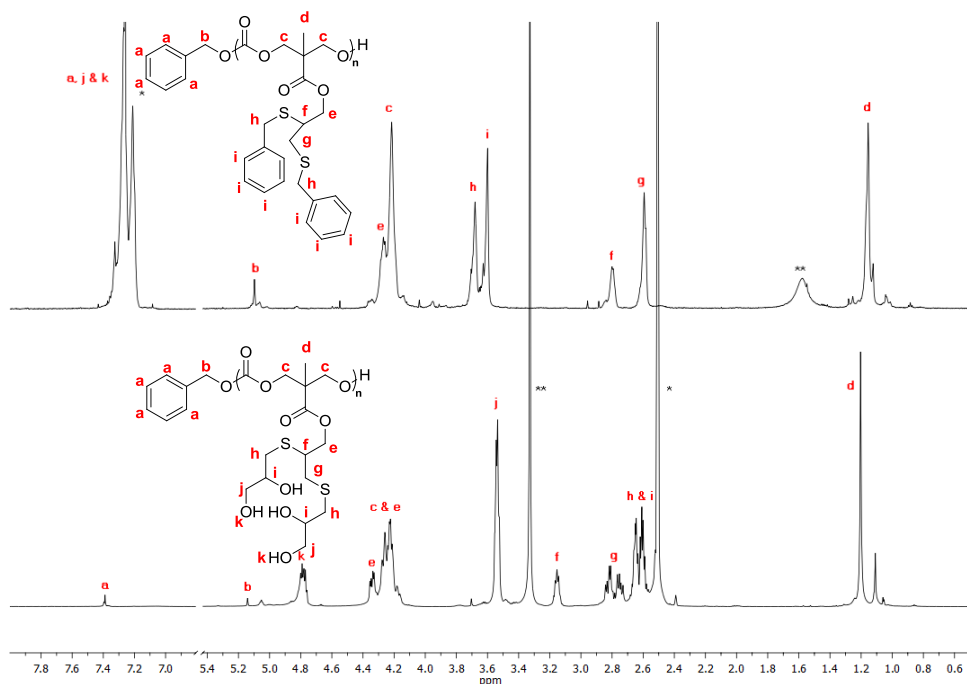

**Figure S7.**  $^1\text{H}$  NMR spectra of PMPC after functionalization with benzyl mercaptan in  $\text{CDCl}_3$  (top) and with 1-thioglycerol in  $d\text{-DMSO}$  (bottom) (400 MHz, 298 K; \* = residual  $\text{CDCl}_3/d\text{-DMSO}$ , \*\* =  $\text{H}_2\text{O}$ ).

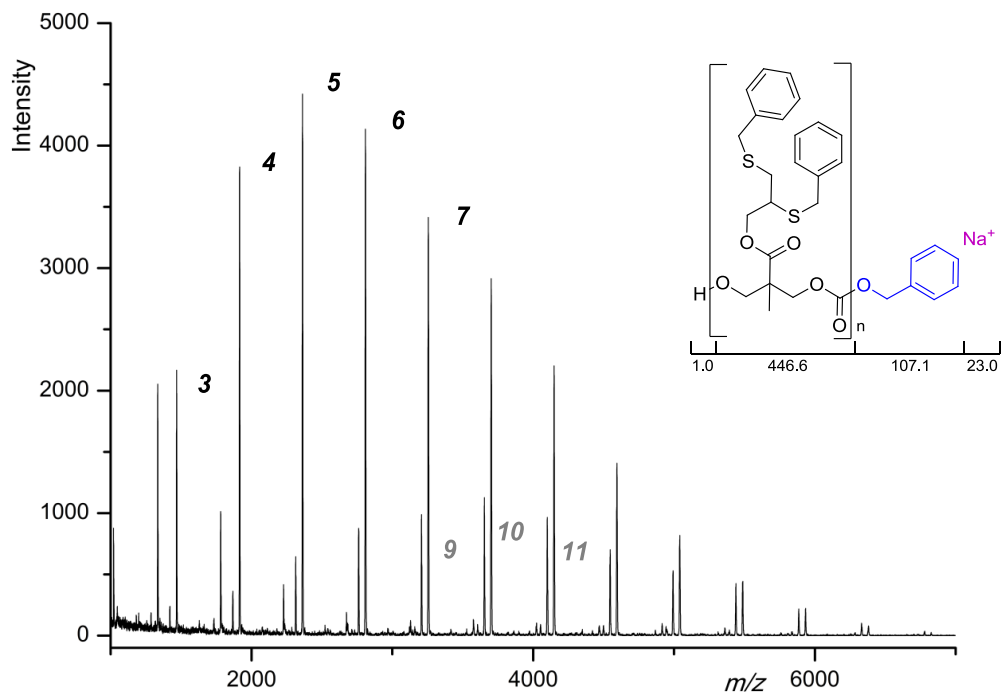

**Figure S8.** MALDI-ToF MS spectrum of PMPC after 'thiol-yne' functionalization with benzyl mercaptan showing a main distribution of fully functionalized polymer (●) and cross-linked, benzyl functionalized PMPC (●).
